# Supplementary material
Source: HighWire-hosted journal article supplement (https://bmjopen.bmj.com/content/15/5/e088136)
Supplement: inline-supplementary-material-1 [file inline-supplementary-material-1.pdf]

## Appendix

## Search Strategies

### PubMed

("multiple chemical sensitivity"[MeSH Terms] OR ("multiple"[Title/Abstract] AND "chemical"[Title/Abstract] AND "sensitivity"[Title/Abstract]) OR "multiple chemical sensitivity"[Title/Abstract] OR ("multiple"[Title/Abstract] AND "chemical"[Title/Abstract] AND "sensitivities"[Title/Abstract]) OR "multiple chemical sensitivities"[Title/Abstract] OR "MCS syndrome"[Title/Abstract] OR "chemical intolerance"[Title/Abstract] OR "chemically intolerant"[Title/Abstract] OR "chemical hypersensitivity"[Title/Abstract] OR "chemical AIDS"[Title/Abstract] OR "chemical sensitivity disorder"[Title/Abstract] OR "chemical sensitivity syndromes"[Title/Abstract] OR "chemophobia"[Title/Abstract] OR "environmental chemical odor intolerance"[Title/Abstract] OR "sensitivity to environmental chemicals"[Title/Abstract] OR ("chemical"[Title/Abstract] AND "environmental illness"[Title/Abstract]) OR "chemically induced environmental illnesses"[Title/Abstract] OR "total allergy syndrome"[Title/Abstract] OR "twentieth century disease"[Title/Abstract] OR "20th century disease"[Title/Abstract] OR "building-related illness"[Title/Abstract] OR "toxicant induced loss of tolerance"[Title/Abstract] OR "Toxicant-Induced Loss of Tolerance"[Title/Abstract] OR chemical hyperreactivity[Title/Abstract] OR chemosensory[Title/Abstract] OR "idiopathic environmental intolerance"[Title/Abstract] OR "idiopathic environmental intolerances"[Title/Abstract] OR "idiopathic environmental illness"[Title/Abstract] OR "symptoms associated with environmental factors"[Title/Abstract])  
Filter: English

### Agricultural & Environmental Science Collection

(noft("multiple chemical sensitivity" OR "multiple chemical sensitivities" OR "MCS syndrome") OR noft("chemical intolerance" OR "chemically intolerant" OR "chemical hypersensitivity" OR "chemical AIDS" OR "chemical sensitivity disorder" OR "chemical sensitivity syndromes" OR "chemophobia") OR noft("environmental chemical odor intolerance" OR "sensitivity to environmental chemicals" OR ("chemical" AND "environmental illness") OR "chemically induced environmental illnesses") OR noft("total allergy syndrome") OR noft("twentieth century disease" OR "20th century disease" OR "building-related illness") OR noft("toxicant induced loss of tolerance" OR "Toxicant-Induced Loss of Tolerance") OR noft("chemical hyperreactivity OR chemosensory") OR noft("idiopathic environmental intolerance" OR "idiopathic environmental intolerances" OR "idiopathic environmental illness" OR "symptoms associated with environmental factors"))  
AND  
(stype.exact("Scholarly Journals" OR "Other Sources" OR "Reports")  
AND  
la.exact("ENG"))

### BIOSIS

TS=("multiple chemical sensitivity" OR "multiple chemical sensitivities" OR "MCS syndrome" OR "chemical intolerance" OR "chemically intolerant" OR "chemical hypersensitivity" OR "chemical AIDS" OR "chemical sensitivity disorder" OR "chemical sensitivity syndromes" OR "chemophobia" OR "environmental chemical odor intolerance" OR "sensitivity to environmental chemicals" OR ("chemical" AND "environmental illness") OR "chemically induced

environmental illnesses" OR "total allergy syndrome" OR "twentieth century disease" OR "20th century disease" OR "building-related illness" OR "toxicant induced loss of tolerance" OR "Toxicant-Induced Loss of Tolerance" OR chemical hyperreactivity OR chemosensory OR "idiopathic environmental intolerance" OR "idiopathic environmental intolerances" OR "idiopathic environmental illness" OR "symptoms associated with environmental factors"

AND

Article (Document Types)

AND

English (Languages)

### CINAHL

TI ( "multiple chemical sensitivity" OR "multiple chemical sensitivities" OR "MCS syndrome" OR "chemical intolerance" OR "chemically intolerant" OR "chemical hypersensitivity" OR "chemical AIDS" OR "chemical sensitivity disorder" OR "chemical sensitivity syndromes" OR "chemophobia" OR "environmental chemical odor intolerance" OR "sensitivity to environmental chemicals" OR ("chemical" AND "environmental illness") OR "chemically induced environmental illnesses" OR "total allergy syndrome" OR "twentieth century disease" OR "20th century disease" OR "building-related illness" OR "toxicant induced loss of tolerance" OR "Toxicant-Induced Loss of Tolerance" OR "idiopathic environmental intolerance" OR "idiopathic environmental intolerances" OR "idiopathic environmental illness" ) OR SU ( "multiple chemical sensitivity" OR "multiple chemical sensitivities" OR "MCS syndrome" OR "chemical intolerance" OR "chemically intolerant" OR "chemical hypersensitivity" OR "chemical AIDS" OR "chemical sensitivity disorder" OR "chemical sensitivity syndromes" OR "chemophobia" OR "environmental chemical odor intolerance" OR "sensitivity to environmental chemicals" OR ("chemical" AND "environmental illness") OR "chemically induced environmental illnesses" OR "total allergy syndrome" OR "twentieth century disease" OR "20th century disease" OR "building-related illness" OR "toxicant induced loss of tolerance" OR "Toxicant-Induced Loss of Tolerance" OR "idiopathic environmental intolerance" OR "idiopathic environmental intolerances" OR "idiopathic environmental illness" ) OR AB ( "multiple chemical sensitivity" OR "multiple chemical sensitivities" OR "MCS syndrome" OR "chemical intolerance" OR "chemically intolerant" OR "chemical hypersensitivity" OR "chemical AIDS" OR "chemical sensitivity disorder" OR "chemical sensitivity syndromes" OR "chemophobia" OR "environmental chemical odor intolerance" OR "sensitivity to environmental chemicals" OR ("chemical" AND "environmental illness") OR "chemically induced environmental illnesses" OR "total allergy syndrome" OR "twentieth century disease" OR "20th century disease" OR "building-related illness" OR "toxicant induced loss of tolerance" OR "Toxicant-Induced Loss of Tolerance" OR "chemical hyperreactivity" OR "chemosensory" OR "idiopathic environmental intolerance" OR "idiopathic environmental intolerances" OR "idiopathic environmental illness" OR "symptoms associated with environmental factors")

AND

English language

### Current Contents

TS=( "multiple chemical sensitivity" OR "multiple chemical sensitivities" OR "MCS syndrome" OR "chemical intolerance" OR "chemically intolerant" OR "chemical hypersensitivity" OR "chemical AIDS" OR "chemical sensitivity disorder" OR "chemical sensitivity syndromes" OR

"chemophobia" OR "environmental chemical odor intolerance" OR "sensitivity to environmental chemicals" OR ("chemical" AND "environmental illness") OR "chemically induced environmental illnesses" OR "total allergy syndrome" OR "twentieth century disease" OR "20th century disease" OR "building-related illness" OR "toxicant induced loss of tolerance" OR "Toxicant-Induced Loss of Tolerance" OR "chemical hyperreactivity" OR "chemosensory" OR "idiopathic environmental intolerance" OR "idiopathic environmental intolerances" OR "idiopathic environmental illness" (Topic) OR "symptoms associated with environmental factors" )

AND

English (Language)

AND

Article or Review Article or Correction (Document Types)

### EMBASE

'multiple chemical sensitivity':ti,ab,kw OR 'multiple chemical sensitivities':ti,ab,kw OR 'mcs syndrome':ti,ab,kw OR 'chemical intolerance':ti,ab,kw OR 'chemically intolerant':ti,ab,kw OR 'chemical hypersensitivity':ti,ab,kw OR 'chemical aids':ti,ab,kw OR 'chemical sensitivity disorder':ti,ab,kw OR 'chemical sensitivity syndromes':ti,ab,kw OR 'chemophobia':ti,ab,kw OR 'environmental chemical odor intolerance':ti,ab,kw OR 'sensitivity to environmental chemicals':ti,ab,kw OR ('chemical':ti,ab,kw AND 'environmental illness':ti,ab,kw) OR 'chemically induced environmental illnesses':ti,ab,kw OR 'total allergy syndrome':ti,ab,kw OR 'twentieth century disease':ti,ab,kw OR '20th century disease':ti,ab,kw OR 'building-related illness':ti,ab,kw OR 'toxicant induced loss of tolerance':ti,ab,kw OR 'toxicant-induced loss of tolerance':ti,ab,kw OR 'chemical hyperreactivity':ti,ab,kw OR 'chemosensory':ti,ab,kw OR 'idiopathic environmental intolerance':ti,ab,kw OR 'idiopathic environmental intolerances':ti,ab,kw OR 'idiopathic environmental illness':ti,ab,kw OR 'symptoms associated with environmental factors':ti,ab,kw

AND

english:la

AND

('article'/it OR 'review'/it)

### Environment Index

TI ( "multiple chemical sensitivity" OR "multiple chemical sensitivities" OR "MCS syndrome" OR "chemical intolerance" OR "chemically intolerant" OR "chemical hypersensitivity" OR "chemical AIDS" OR "chemical sensitivity disorder" OR "chemical sensitivity syndromes" OR "chemophobia" OR "environmental chemical odor intolerance" OR "sensitivity to environmental chemicals" OR ("chemical" AND "environmental illness") OR "chemically induced environmental illnesses" OR "total allergy syndrome" OR "twentieth century disease" OR "20th century disease" OR "building-related illness" OR "toxicant induced loss of tolerance" OR "Toxicant-Induced Loss of Tolerance" OR "chemical hyperreactivity" OR "chemosensory" OR "idiopathic environmental intolerance" OR "idiopathic environmental intolerances" OR "idiopathic environmental illness" ) OR SU ( "multiple chemical sensitivity" OR "multiple chemical sensitivities" OR "MCS syndrome" OR "chemical intolerance" OR "chemically intolerant" OR "chemical hypersensitivity" OR "chemical AIDS" OR "chemical sensitivity disorder" OR "chemical sensitivity syndromes" OR "chemophobia" OR "environmental chemical

odor intolerance" OR "sensitivity to environmental chemicals" OR ("chemical" AND "environmental illness") OR "chemically induced environmental illnesses" OR "total allergy syndrome" OR "twentieth century disease" OR "20th century disease" OR "building-related illness" OR "toxicant induced loss of tolerance" OR "Toxicant-Induced Loss of Tolerance" OR "chemical hyperreactivity" OR "chemosensory" OR "idiopathic environmental intolerance" OR "idiopathic environmental intolerances" OR "idiopathic environmental illness" ) OR AB ( "multiple chemical sensitivity" OR "multiple chemical sensitivities" OR "MCS syndrome" OR "chemical intolerance" OR "chemically intolerant" OR "chemical hypersensitivity" OR "chemical AIDS" OR "chemical sensitivity disorder" OR "chemical sensitivity syndromes" OR "chemophobia" OR "environmental chemical odor intolerance" OR "sensitivity to environmental chemicals" OR ("chemical" AND "environmental illness") OR "chemically induced environmental illnesses" OR "total allergy syndrome" OR "twentieth century disease" OR "20th century disease" OR "building-related illness" OR "toxicant induced loss of tolerance" OR "Toxicant-Induced Loss of Tolerance" OR "chemical hyperreactivity" OR "chemosensory" OR "idiopathic environmental intolerance" OR "idiopathic environmental intolerances" OR "idiopathic environmental illness" OR "symptoms associated with environmental factors") AND English language

### Environmental Science

Search: TI ("multiple chemical sensitivity" OR "multiple chemical sensitivities" OR "MCS syndrome" OR "chemical intolerance" OR "chemically intolerant" OR "chemical hypersensitivity" OR "chemical AIDS" OR "chemical sensitivity disorder" OR "chemical sensitivity syndromes" OR "chemophobia" OR "environmental chemical odor intolerance" OR "sensitivity to environmental chemicals" OR ("chemical" AND "environmental illness") OR "chemically induced environmental illnesses" OR "total allergy syndrome" OR "twentieth century disease" OR "20th century disease" OR "building-related illness" OR "toxicant induced loss of tolerance" OR "Toxicant-Induced Loss of Tolerance" OR "chemical hyperreactivity" OR "chemosensory" OR "idiopathic environmental intolerance" OR "idiopathic environmental intolerances" OR "idiopathic environmental illness" OR "symptoms associated with environmental factors") OR SU ("multiple chemical sensitivity" OR "multiple chemical sensitivities" OR "MCS syndrome" OR "chemical intolerance" OR "chemically intolerant" OR "chemical hypersensitivity" OR "chemical AIDS" OR "chemical sensitivity disorder" OR "chemical sensitivity syndromes" OR "chemophobia" OR "environmental chemical odor intolerance" OR "sensitivity to environmental chemicals" OR ("chemical" AND "environmental illness") OR "chemically induced environmental illnesses" OR "total allergy syndrome" OR "twentieth century disease" OR "20th century disease" OR "building-related illness" OR "toxicant induced loss of tolerance" OR "Toxicant-Induced Loss of Tolerance" OR "chemical hyperreactivity" OR "chemosensory" OR "idiopathic environmental intolerance" OR "idiopathic environmental intolerances" OR "idiopathic environmental illness" OR "symptoms associated with environmental factors") OR AB ("multiple chemical sensitivity" OR "multiple chemical sensitivities" OR "MCS syndrome" OR "chemical intolerance" OR "chemically intolerant" OR "chemical hypersensitivity" OR "chemical AIDS" OR "chemical sensitivity disorder" OR "chemical sensitivity syndromes" OR "chemophobia" OR "environmental chemical odor intolerance" OR "sensitivity to environmental chemicals" OR ("chemical" AND "environmental illness") OR "chemically induced environmental illnesses" OR "total allergy syndrome" OR "twentieth century disease" OR "20th

century disease” OR “building-related illness” OR "toxicant induced loss of tolerance" OR "Toxicant-Induced Loss of Tolerance" OR "chemical hyperreactivity" OR "chemosensory" OR "idiopathic environmental intolerance" OR "idiopathic environmental intolerances" OR "idiopathic environmental illness" OR “symptoms associated with environmental factors”)  
 AND  
 Source Type: Reports, Scholarly Journals, Working Papers  
 AND  
 Language: English

### Healthcare Administration

noft("multiple chemical sensitivity" OR "multiple chemical sensitivities" OR "MCS syndrome" OR "chemical intolerance" OR "chemically intolerant" OR "chemical hypersensitivity" OR "chemical AIDS" OR "chemical sensitivity disorder" OR "chemical sensitivity syndromes" OR "chemophobia" OR "environmental chemical odor intolerance" OR "sensitivity to environmental chemicals" OR ("chemical" AND "environmental illness") OR "chemically induced environmental illnesses" OR "total allergy syndrome" OR “twentieth century disease” OR “20th century disease” OR “building-related illness” OR “toxicant induced loss of tolerance” OR "Toxicant-Induced Loss of Tolerance" OR "chemical hyperreactivity" OR "chemosensory" OR "idiopathic environmental intolerance" OR "idiopathic environmental intolerances" OR "idiopathic environmental illness" OR “symptoms associated with environmental factors”)  
 Limits applied  
 AND  
 Source type: Reports, Scholarly Journals  
 AND  
 Language: English

### HERO

"multiple chemical sensitivity" OR "multiple chemical sensitivities" OR "MCS syndrome" OR "chemical intolerance" OR "chemically intolerant" OR "chemical hypersensitivity" OR "chemical AIDS" OR "chemical sensitivity disorder" OR "chemical sensitivity syndromes" OR "chemophobia" OR "environmental chemical odor intolerance" OR "sensitivity to environmental chemicals" OR ("chemical" AND "environmental illness") OR "chemically induced environmental illnesses" OR "total allergy syndrome" OR “twentieth century disease” OR “20th century disease” OR “building-related illness” OR “toxicant induced loss of tolerance” OR "chemical hyperreactivity" OR "chemosensory" OR "idiopathic environmental intolerance" OR "idiopathic environmental intolerances" OR "idiopathic environmental illness" OR “symptoms associated with environmental factors”  
 AND  
 Language: English

### PsycINFO

((Language: (English))) AND (((title: ("multiple chemical sensitivity")) OR (title: ("multiple chemical sensitivities")) OR (title: ("MCS syndrome")) OR (title: ("chemical intolerance")) OR (title: ("chemically intolerant")) OR (title: ("chemical hypersensitivity")) OR (title: ("chemical AIDS")) OR (title: ("chemical sensitivity disorder")) OR (title: ("chemical sensitivity syndromes")) OR (title: ("chemophobia")) OR (title: ("environmental chemical odor



intolerance")) OR (title: ("sensitivity to environmental chemicals")) OR ((title: ("chemical")) AND (title: ("environmental illness"))) OR (title: ("chemically induced environmental illnesses")) OR (title: ("total allergy syndrome")) OR (title: ("twentieth century disease")) OR (title: ("20th century disease")) OR (title: ("building-related illness")) OR (title: ("toxicant induced loss of tolerance")) OR (title: ("Toxicant-Induced Loss of Tolerance")) OR (title: ("chemical hyperreactivity")) OR (title: ("chemosensory")) OR (title: ("idiopathic environmental intolerance")) OR (title: ("idiopathic environmental intolerances")) OR (title: ("idiopathic environmental illness")) OR (title: ("symptoms associated with environmental factors"))) OR ((abstract: ("multiple chemical sensitivity")) OR (abstract: ("multiple chemical sensitivities")) OR (abstract: ("MCS syndrome")) OR (abstract: ("chemical intolerance")) OR (abstract: ("chemically intolerant")) OR (abstract: ("chemical hypersensitivity")) OR (abstract: ("chemical AIDS")) OR (abstract: ("chemical sensitivity disorder")) OR (abstract: ("chemical sensitivity syndromes")) OR (abstract: ("chemophobia")) OR (abstract: ("environmental chemical odor intolerance")) OR (abstract: ("sensitivity to environmental chemicals")) OR ((abstract: ("chemical")) AND (abstract: ("environmental illness"))) OR (abstract: ("chemically induced environmental illnesses")) OR (abstract: ("total allergy syndrome")) OR (abstract: ("twentieth century disease")) OR (abstract: ("20th century disease")) OR (abstract: ("building-related illness")) OR (abstract: ("toxicant induced loss of tolerance")) OR (abstract: ("Toxicant-Induced Loss of Tolerance")) OR (abstract: ("chemical hyperreactivity")) OR (abstract: ("chemosensory")) OR (abstract: ("idiopathic environmental intolerance")) OR (abstract: ("idiopathic environmental intolerances")) OR (abstract: ("idiopathic environmental illness")) OR (abstract: ("symptoms associated with environmental factors"))) OR ((Index Terms: ("multiple chemical sensitivity")) OR (Index Terms: ("multiple chemical sensitivities")) OR (Index Terms: ("MCS syndrome")) OR (Index Terms: ("chemical intolerance")) OR (Index Terms: ("chemically intolerant")) OR (Index Terms: ("chemical hypersensitivity")) OR (Index Terms: ("chemical AIDS")) OR (Index Terms: ("chemical sensitivity disorder")) OR (Index Terms: ("chemical sensitivity syndromes")) OR (Index Terms: ("chemophobia")) OR (Index Terms: ("environmental chemical odor intolerance")) OR (Index Terms: ("sensitivity to environmental chemicals")) OR ((Index Terms: ("chemical")) AND (Index Terms: ("environmental illness"))) OR (Index Terms: ("chemically induced environmental illnesses")) OR (Index Terms: ("total allergy syndrome")) OR (Index Terms: ("twentieth century disease")) OR (Index Terms: ("20th century disease")) OR (Index Terms: ("building-related illness")) OR (Index Terms: ("toxicant induced loss of tolerance")) OR (Index Terms: ("Toxicant-Induced Loss of Tolerance")) OR (Index Terms: ("chemical hyperreactivity")) OR (Index Terms: ("chemosensory")) OR (Index Terms: ("idiopathic environmental intolerance")) OR (Index Terms: ("idiopathic environmental intolerances")) OR (Index Terms: ("idiopathic environmental illness")) OR (Index Terms: ("symptoms associated with environmental factors")))))

AND

Publication Type: Peer Reviewed Journal

### SciFinder

"multiple chemical sensitivity" OR "multiple chemical sensitivities" OR "chemical intolerance" OR "chemically intolerant" OR "chemical hypersensitivity" OR "chemical AIDS" OR "chemical sensitivity disorder" OR "chemical sensitivity syndromes" OR "chemophobia" OR "environmental chemical odor intolerance" OR "sensitivity to environmental chemicals" OR ("chemical" AND "environmental illness") OR "chemically induced environmental illnesses" OR

"total allergy syndrome" OR "twentieth century disease" OR "20th century disease" OR "building-related illness" OR "toxicant induced loss of tolerance" OR "Toxicant-Induced Loss of Tolerance" OR "chemical hyperreactivity" OR "chemosensory" OR "idiopathic environmental intolerance" OR "idiopathic environmental intolerances" OR "idiopathic environmental illness" OR "symptoms associated with environmental factors"

AND

English language

AND

Exclude: Patent, Book, Commentary, Conference, Dissertation, Editorial, Letter

### SCOPUS

( TITLE-ABS-KEY ( "multiple chemical sensitivity" OR "multiple chemical sensitivities" OR "MCS syndrome" OR "chemical intolerance" OR "chemically intolerant" OR "chemical hypersensitivity" OR "chemical AIDS" OR "chemical sensitivity disorder" OR "chemical sensitivity syndromes" OR "chemophobia" OR "environmental chemical odor intolerance" OR "sensitivity to environmental chemicals" OR ( "chemical" AND "environmental illness" ) OR "chemically induced environmental illnesses" OR "total allergy syndrome" OR "twentieth century disease" OR "20th century disease" OR "building-related illness" OR "toxicant induced loss of tolerance" OR "Toxicant-Induced Loss of Tolerance" OR "chemical hyperreactivity" OR "chemosensory" OR "idiopathic environmental intolerance" OR "idiopathic environmental intolerances" OR "idiopathic environmental illness" OR "symptoms associated with environmental factors" )

AND

(LIMIT-TO (DOCTYPE, "ar") OR LIMIT-TO (DOCTYPE, "re"))

AND

(LIMIT-TO ( LANGUAGE, "English" ) )

### Web of Science

"multiple chemical sensitivity" OR "multiple chemical sensitivities" OR "MCS syndrome" or "chemical intolerance" OR "chemically intolerant" OR "chemical hypersensitivity" OR "chemical AIDS" OR "chemical sensitivity disorder" OR "chemical sensitivity syndromes" OR "chromophobia" or "environmental chemical odor intolerance" OR "sensitivity to environmental chemicals" OR ("chemical" AND "environmental illness") OR "chemically induced environmental illnesses" OR "total allergy syndrome" OR "twentieth century disease" OR "20th century disease" OR "building-related illness" or "toxicant induced loss of tolerance" OR "Toxicant-Induced Loss of Tolerance" OR "chemical hyperreactivity" OR "chemosensory" OR "idiopathic environmental intolerance" OR "idiopathic environmental intolerances" OR "idiopathic environmental illness" OR "symptoms associated with environmental factors"

(Topic)

AND

English (Language)

AND

Article or Review Article (Document Types)

### G-I-N

"multiple chemical sensitivity" OR "multiple chemical sensitivities" OR "chemical intolerance"



**ECRI**

“multiple chemical sensitivity” OR “multiple chemical sensitivities” OR “chemical intolerance”

**MAGICapp**

mutiple chemical sensitivity, multiple chemical sensitivities, chemical intolerance

**Guideline Resources Online**

mutiple chemical sensitivity, multiple chemical sensitivities, chemical intolerance

**TRIP Medical Database**

mutiple chemical sensitivity, multiple chemical sensitivities, chemical intolerance

**ClinicalKey**

mutiple chemical sensitivity, multiple chemical sensitivities, chemical intolerance

**ClinicalTrials.gov** (classic website)

“multiple chemical sensitivity” OR “multiple chemical sensitivities” OR “chemical intolerance”  
AND Completed Studies

**WHO International Clinical Trials Registry Platform**

“multiple chemical sensitivity” OR “multiple chemical sensitivities” OR “chemical intolerance”

Evidence Tables

Draft Operational MCS Definitions Component Table

| Operational Definition  | Disorder is acquired in relation to some documentable environmental exposure, insult or illness | Symptoms involve more than 1 organ system | Symptoms recur and abate in response to predictable stimuli | Symptoms are elicited by exposures to chemicals of diverse structural classes and toxicologic modes of actions | Symptoms are elicited by exposures that are demonstrable | Exposure that elicits symptoms must be very low | No single widely available test of organ systems function can explain symptoms |
|-------------------------|-------------------------------------------------------------------------------------------------|-------------------------------------------|-------------------------------------------------------------|----------------------------------------------------------------------------------------------------------------|----------------------------------------------------------|-------------------------------------------------|--------------------------------------------------------------------------------|
| Reference: Cullen, 1987 | Yes                                                                                             | Yes                                       | Yes                                                         | Yes                                                                                                            | Yes                                                      | Yes                                             | Yes                                                                            |
|                         |                                                                                                 |                                           |                                                             |                                                                                                                |                                                          |                                                 |                                                                                |
|                         |                                                                                                 |                                           |                                                             |                                                                                                                |                                                          |                                                 |                                                                                |
|                         |                                                                                                 |                                           |                                                             |                                                                                                                |                                                          |                                                 |                                                                                |

Draft Evidence Table KQ A: MCS Operational Definitions

| Author, year<br>Endorsing body | Terminology<br>Definition | Diagnostic<br>criteria | Changes and rationale^ | Development process | Content validity | Construct validity | Criterion validity |
|--------------------------------|---------------------------|------------------------|------------------------|---------------------|------------------|--------------------|--------------------|
|                                |                           |                        |                        |                     |                  |                    |                    |
|                                |                           |                        |                        |                     |                  |                    |                    |
|                                |                           |                        |                        |                     |                  |                    |                    |
|                                |                           |                        |                        |                     |                  |                    |                    |

Note: ^ if the definition is a modification of a published definition

Draft Evidence Table KQ B: MCS Diagnostic Tools

| Author, year<br>Country | Terminology<br>Definition or criteria of MCS | Sample characteristics | Reference standard | Reliability | Validity | Index Tests<br>Diagnostic performance |
|-------------------------|----------------------------------------------|------------------------|--------------------|-------------|----------|---------------------------------------|
|                         |                                              |                        |                    |             |          |                                       |
|                         |                                              |                        |                    |             |          |                                       |
|                         |                                              |                        |                    |             |          |                                       |

Draft Evidence Table KQ C: MCS Prevalence and Incidence

| Author, year<br>Year of | Recruitment strategy | Case definition of MCS | Incidence | Denominator:<br>Prevalence:<br>Denominator 2: |
|-------------------------|----------------------|------------------------|-----------|-----------------------------------------------|
|-------------------------|----------------------|------------------------|-----------|-----------------------------------------------|

| estimate<br>Size | Geographic<br>region |  |  | Prevalence 2: |
|------------------|----------------------|--|--|---------------|
|                  |                      |  |  |               |
|                  |                      |  |  |               |
|                  |                      |  |  |               |

**Draft Evidence Table KQ D: MCS as a Distinct Disorder**

| Author,<br>year | Study aim | Analytic approach | Authors' conclusion regarding MCS<br>as a distinct disorder |
|-----------------|-----------|-------------------|-------------------------------------------------------------|
|                 |           |                   |                                                             |
|                 |           |                   |                                                             |
|                 |           |                   |                                                             |

**Draft Evidence Table KQ E: Underlying Mechanism Resulting in MCS**

| Author, year<br>Mechanism category | Biological<br>mechanism<br>description<br><br>Method to<br>test the<br>hypothesis<br><br>Type of<br>evidence | Strength of<br>association<br><br>Consistency | Specificity<br><br>Discriminant<br>validity | Temporality<br><br>Biological<br>gradient<br><br>Plausibility<br><br>Coherence | Experimental<br>evidence<br><br>Analog<br>evidence | Authors'<br>conclusion |
|------------------------------------|--------------------------------------------------------------------------------------------------------------|-----------------------------------------------|---------------------------------------------|--------------------------------------------------------------------------------|----------------------------------------------------|------------------------|
|                                    |                                                                                                              |                                               |                                             |                                                                                |                                                    |                        |
|                                    |                                                                                                              |                                               |                                             |                                                                                |                                                    |                        |
|                                    |                                                                                                              |                                               |                                             |                                                                                |                                                    |                        |

**Draft Evidence Table KQ F: MCS Interventions**

| Author,<br>publication<br>year<br><br>Country<br><br>Study design | MCS<br>operationalization<br><br>N<br><br>Sample<br>characteristics<br><br>Clinical setting | Intervention type<br><br>Intervention<br>characteristics | Control /<br>Comparator<br>type<br><br>Control /<br>Comparator<br>details | Effectiveness<br>outcome<br>measure and<br>results | Adverse<br>event<br>measure and<br>results |
|-------------------------------------------------------------------|---------------------------------------------------------------------------------------------|----------------------------------------------------------|---------------------------------------------------------------------------|----------------------------------------------------|--------------------------------------------|
|                                                                   |                                                                                             |                                                          |                                                                           |                                                    |                                            |
|                                                                   |                                                                                             |                                                          |                                                                           |                                                    |                                            |
|                                                                   |                                                                                             |                                                          |                                                                           |                                                    |                                            |

## Draft Critical Appraisal Tables

### Draft KQ A (Definition Validity) Critical Appraisal

| Study ID | Validity testing | Evidence-based | Stakeholder engagement | Source |
|----------|------------------|----------------|------------------------|--------|
|          |                  |                |                        |        |
|          |                  |                |                        |        |
|          |                  |                |                        |        |

### Draft KQB (Tool Performance) Critical Appraisal

| Study ID | Patient selection | Index test | Reference standard | Flow and timing |
|----------|-------------------|------------|--------------------|-----------------|
|          |                   |            |                    |                 |
|          |                   |            |                    |                 |
|          |                   |            |                    |                 |

### Draft KQC (Prevalence and Incidence) Critical Appraisal

| Study ID | Participants | Exposure / Intervention | Comparison | Measures | Setting | Design |
|----------|--------------|-------------------------|------------|----------|---------|--------|
|          |              |                         |            |          |         |        |
|          |              |                         |            |          |         |        |
|          |              |                         |            |          |         |        |

### Draft KQD (Distinct Disorder) Critical Appraisal

| Study ID | Participants | Statistical analysis | Measured | Methods | Data | Setting | Size | Sample | Frame |
|----------|--------------|----------------------|----------|---------|------|---------|------|--------|-------|
|          |              |                      |          |         |      |         |      |        |       |
|          |              |                      |          |         |      |         |      |        |       |
|          |              |                      |          |         |      |         |      |        |       |

### Draft KQ E (Underlying Mechanism) Critical Appraisal

| Study ID | Eligibility | Sample | Exposure | Condition measurement | Confounding | Outcome measurement | Other |
|----------|-------------|--------|----------|-----------------------|-------------|---------------------|-------|
|          |             |        |          |                       |             |                     |       |
|          |             |        |          |                       |             |                     |       |
|          |             |        |          |                       |             |                     |       |

### Draft KQ F (Interventions) Critical Appraisal

| Study ID | Selection bias | Performance bias | Attrition bias | Detection bias | Reporting bias | Other source of bias |
|----------|----------------|------------------|----------------|----------------|----------------|----------------------|
|          |                |                  |                |                |                |                      |
|          |                |                  |                |                |                |                      |
|          |                |                  |                |                |                |                      |

Draft Summary of Findings and Certainty of Evidence Table

| KQ                              | Study design,<br>number of studies | Reasons for<br>downgrading<br>Quality of<br>Evidence | Findings across publications | GRADE<br>category |
|---------------------------------|------------------------------------|------------------------------------------------------|------------------------------|-------------------|
| KQ A<br>Definition              |                                    |                                                      |                              |                   |
| Definitions                     |                                    |                                                      |                              |                   |
|                                 |                                    |                                                      |                              |                   |
|                                 |                                    |                                                      |                              |                   |
|                                 |                                    |                                                      |                              |                   |
|                                 |                                    |                                                      |                              |                   |
|                                 |                                    |                                                      |                              |                   |
| KQ B<br>Diagnosis               |                                    |                                                      |                              |                   |
| Test / diagnostic<br>marker     |                                    |                                                      |                              |                   |
|                                 |                                    |                                                      |                              |                   |
|                                 |                                    |                                                      |                              |                   |
|                                 |                                    |                                                      |                              |                   |
| Genetic marker                  |                                    |                                                      |                              |                   |
|                                 |                                    |                                                      |                              |                   |
|                                 |                                    |                                                      |                              |                   |
|                                 |                                    |                                                      |                              |                   |
| KQC<br>Prevalence               |                                    |                                                      |                              |                   |
| Prevalence<br>estimates         |                                    |                                                      |                              |                   |
|                                 |                                    |                                                      |                              |                   |
|                                 |                                    |                                                      |                              |                   |
|                                 |                                    |                                                      |                              |                   |
| Incidence<br>estimates          |                                    |                                                      |                              |                   |
|                                 |                                    |                                                      |                              |                   |
|                                 |                                    |                                                      |                              |                   |
|                                 |                                    |                                                      |                              |                   |
| KQD<br>Disorder<br>evidence     |                                    |                                                      |                              |                   |
|                                 |                                    |                                                      |                              |                   |
|                                 |                                    |                                                      |                              |                   |
| Direct evidence                 |                                    |                                                      |                              |                   |
|                                 |                                    |                                                      |                              |                   |
|                                 |                                    |                                                      |                              |                   |
|                                 |                                    |                                                      |                              |                   |
| Mechanistic<br>evidence         |                                    |                                                      |                              |                   |
|                                 |                                    |                                                      |                              |                   |
|                                 |                                    |                                                      |                              |                   |
|                                 |                                    |                                                      |                              |                   |
| Parallel evidence               |                                    |                                                      |                              |                   |
|                                 |                                    |                                                      |                              |                   |
|                                 |                                    |                                                      |                              |                   |
|                                 |                                    |                                                      |                              |                   |
| KQ E<br>Biological<br>mechanism |                                    |                                                      |                              |                   |

|                      |  |  |  |  |
|----------------------|--|--|--|--|
| Biological mechanism |  |  |  |  |
|                      |  |  |  |  |
|                      |  |  |  |  |
|                      |  |  |  |  |
| KQ F Interventions   |  |  |  |  |
| Intervention         |  |  |  |  |
| Comparator           |  |  |  |  |
| Outcome              |  |  |  |  |
|                      |  |  |  |  |
|                      |  |  |  |  |
|                      |  |  |  |  |
